# Supplementary material for: Surface removal of a copper thin film in an ultrathin water environment by a molecular dynamics study
Source: Springer Nature journal article supplement (doi:10.1007/s40544-019-0258-6), 2019-03-02
Supplement: 40544_2019_258_MOESM1_ESM.pdf [file 40544_2019_258_MOESM1_ESM.pdf]

## Electronic Supplementary Material

# Surface removal of a copper thin film in an ultrathin water environment by a molecular dynamics study

Junqin SHI<sup>1</sup>, Liang FANG<sup>1,2,\*</sup>, Kun SUN<sup>1,\*</sup>, Weixiang PENG<sup>1</sup>, Juan GHEN<sup>1</sup>, Meng ZHANG<sup>1</sup>

<sup>1</sup> State Key Laboratory for Mechanical Behavior of Materials, Xi'an Jiaotong University, Xi'an 710049, China

<sup>2</sup> School of Mechanical and Electrical Engineering, Xiamen University Tan KahKee College, Zhangzhou 363105, China

Supporting information to <https://doi.org/10.1007/s12274-019-0258-6>

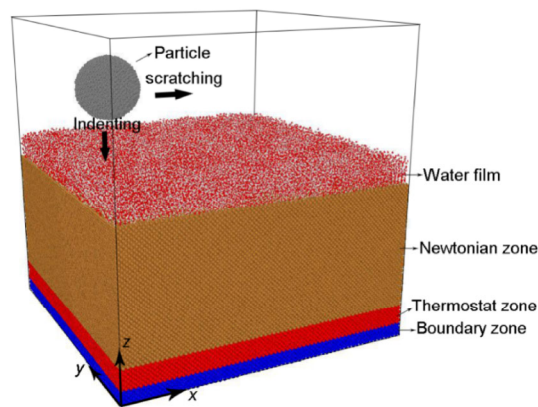

**Fig. S1** Schematic model of the MD simulation system.

**Table S1** Parameters used in the MD simulations.

| Properties                     | Parameters                                                                                                                                                                   |
|--------------------------------|------------------------------------------------------------------------------------------------------------------------------------------------------------------------------|
| Abrasive particle              | Diamond, sphere with radius of 2.5 nm, 11,976 atoms                                                                                                                          |
| Water film                     | Density of 1.0 g·cm <sup>-3</sup> , thickness ( <i>H</i> ): 0.3 nm, 0.5 nm, and 1.0 nm                                                                                       |
| Workpiece                      | Cu (FCC), 68 <i>a</i> × 68 <i>a</i> × 35 <i>a</i> ( <i>a</i> = 0.3615 nm), 656,608 atoms                                                                                     |
| Potential for Cu thin film     | EAM potential: $E_i = F_\alpha \left( \sum_{j \neq i} \rho_\beta(r_{ij}) \right) + \frac{1}{2} \sum_{j \neq i} \phi_{\alpha\beta}(r_{ij})$                                   |
| Potential for particle–Cu film | Morse potential: $E = D_0 \left[ e^{-2\alpha(r-r_0)} - 2e^{-\alpha(r-r_0)} \right]$ $r < r_c$<br>where $D_0 = 0.1$ eV, $\alpha = 1.7 \text{ \AA}^{-1}$ , and $r_0 = 0.22$ nm |
| Potential for water molecules  | O–O, $\epsilon = 0.1554$ kcal/mol, $\delta = 0.31655$ nm                                                                                                                     |
| Potential for water–particle   | O–C, $\epsilon = 0.1$ kcal/mol, $\delta = 0.3275$ nm                                                                                                                         |
| Potential for water–workpiece  | O–Cu, $\epsilon = 0.2708$ kcal/mol, $\delta = 0.28877$ nm                                                                                                                    |
| Scratching                     | Depth: –0.2 nm, 0.1 nm, 0.5 nm, 1.0 nm; distance: 9.0 nm; $v = 10 \text{ m}\cdot\text{s}^{-1}$                                                                               |

\* Corresponding authors: Liang FANG, E-mail: fangl@xjtu.edu.cn; Kun SUN, E-mail: sunkun@mail.xjtu.edu.cn

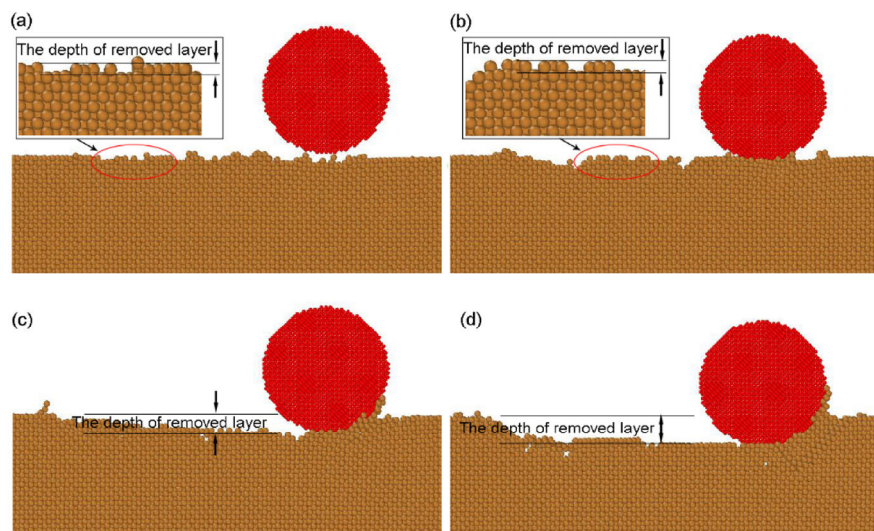

**Fig. S2** Snapshots of the worn morphology of a slice (with 0.5 nm thickness) of the  $xz$  plane under various scratching depths ( $h$ ): (a)  $-0.2$  nm, (b)  $0.1$  nm, (c)  $0.5$  nm, and (d)  $1.0$  nm, at a scratching distance of  $9$  nm, for nanoscratching with a water film of  $1.0$  nm thickness.

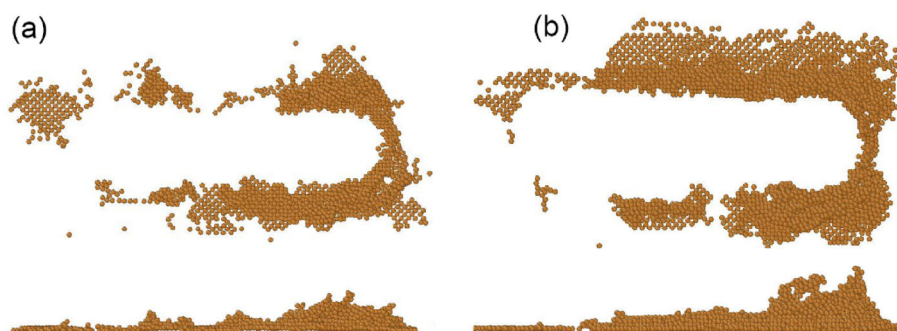

**Fig. S3** Snapshots of the ridge morphology for nanoscratching with a water film thickness of  $1.0$  nm at a scratching depth of (a)  $0.5$  nm and (b)  $1.0$  nm.

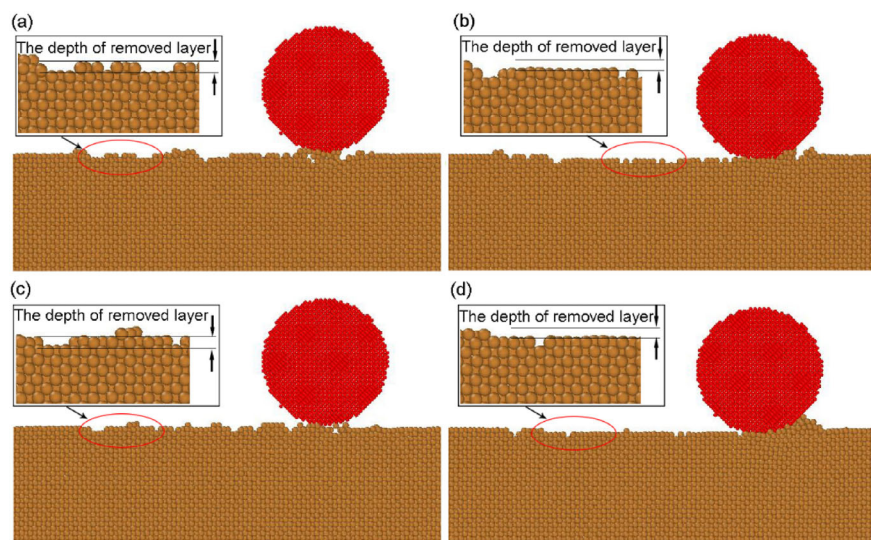

**Fig. S4** Snapshots of the worn morphology of the cross-sectional views of the  $xz$  plane with the omission of the water film under various water film thicknesses ( $H$ ) and scratching depths ( $h$ ),  $H = 0.3$  nm: (a)  $h = -0.2$  nm, (b)  $h = 0.1$  nm;  $H = 0.5$  nm: (c)  $h = -0.2$  nm, (d)  $h = 0.1$  nm.

For dry nanoscratching, Figs. S5(a) and S5(b) show that the monoatomic layer removal occurs at a scratching depth of 0.1 nm, whereas the Cu surface is still maintained with its perfect lattice structure at a scratching depth of  $-0.2$  nm.

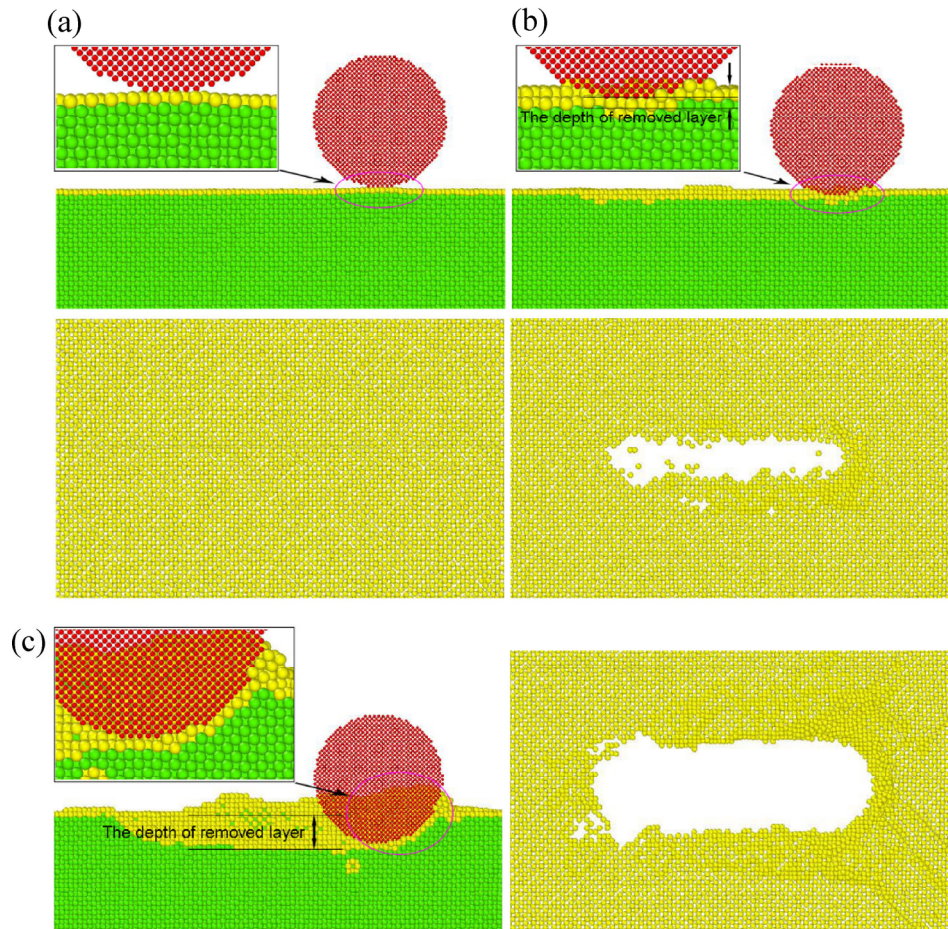

**Fig. S5** Snapshots of the worn morphology of the cross-sectional views of the  $xz$  plane and plane views of the  $xy$  plane under various scratching depths ( $h$ ): (a)  $-0.2$  nm, (b)  $0.1$  nm, and (c)  $1.0$  nm, at a scratching distance of  $9$  nm, for the dry nanoscratching process. Yellow and green spheres represent the initial surface of the Cu atoms, and other Cu atoms, red represent the abrasive particle.

As the scratching depth increases to  $1.0$  nm in Fig. S5(c), the abrasive particle contacts the Cu atoms and results in a large removed zone. Practically all the surface Cu atoms in contact with the particle are removed during the scratching process. As the particle moves forward, numerous deformed atoms accumulate to form clusters or chips ahead of the particle. Concurrently, the remarkable ridges along both the left and right sides of the particle were produced. After the particle passes by, a groove is formed.
